# Supplementary material for: Population structure of Symbiodinium sp. associated with the common sea fan, Gorgonia ventalina, in the Florida Keys across distance, depth, and time
Source: Springer Nature journal article supplement (doi:10.1007/s00227-009-1196-z), 2009-04-24
Supplement: MOESM8 [file 227_2009_1196_MOESM8_ESM.doc]

**Supplementary Table 2** Characteristics and distribution of the 388 genotypes identified from the *Symbiodinium* populations of *Gorgonia ventalina* in the Florida Keys. Genotypes are based on allele sizes (in bp) for six microsatellite loci. Genotype frequency by recovery location is denoted. Site abbreviations are given in Table 1.

|  | CA 6.38 | Gv 42 | Gv 2 | Gv 100 | Sym 155 | Sym 254 | Times recovered | Sample Location |
| --- | --- | --- | --- | --- | --- | --- | --- | --- |
| 1 | 102 | 160 | 193 | 288 | 260 | 169 | 1 | ESD |
| 2 | 102 | 160 | 195 | 303 | 266 | 175 | 1 | TENS |
| 3 | 102 | 160 | 195 | 309 | 254 | 187 | 1 | CARS |
| 4 | 102 | 160 | 197 | 300 | 272 | 175 | 1 | RUBS |
| 5 | 102 | 160 | 197 | 303 | 266 | 178 | 1 | RUBS |
| 6 | 102 | 160 | 197 | 303 | 275 | 175 | 1 | RUBS |
| 7 | 102 | 160 | 197 | 306 | 266 | 175 | 1 | TEND |
| 8 | 102 | 160 | 197 | 306 | 269 | 175 | 1 | RUBS |
| 9 | 102 | 160 | 197 | 309 | 254 | 190 | 1 | CARS |
| 10 | 102 | 162 | 197 | 306 | 266 | 172 | 1 | RUBS |
| 11 | 104 | 160 | 197 | 285 | 272 | 193 | 1 | SANS |
| 12 | 104 | 160 | 197 | 294 | 260 | 163 | 1 | ESSO |
| 13 | 104 | 160 | 197 | 297 | 266 | 187 | 1 | PICSN |
| 14 | 104 | 160 | 197 | 300 | 266 | 190 | 1 | CARS |
| 15 | 104 | 160 | 197 | 303 | 257 | 178 | 1 | ALLS |
| 16 | 104 | 160 | 197 | 303 | 263 | 178 | 1 | CARS |
| 17 | 104 | 160 | 197 | 303 | 263 | 181 | 2 | RUBS |
| 18 | 104 | 160 | 197 | 303 | 266 | 181 | 1 | MOLS |
| 19 | 104 | 160 | 197 | 303 | 272 | 175 | 1 | TENS |
| 20 | 104 | 160 | 197 | 303 | 272 | 190 | 1 | ESD |
| 21 | 104 | 160 | 197 | 306 | 254 | 190 | 1 | CARS |
| 22 | 104 | 160 | 197 | 306 | 260 | 187 | 1 | CARS |
| 23 | 104 | 160 | 197 | 309 | 257 | 190 | 1 | CARS |
| 24 | 104 | 160 | 197 | 309 | 260 | 181 | 1 | MOLS |
| 25 | 104 | 160 | 197 | 309 | 269 | 178 | 1 | RUBS |
| 26 | 104 | 160 | 197 | 312 | 257 | 175 | 1 | RUBS |
| 27 | 104 | 160 | 197 | 312 | 257 | 184 | 1 | CARS |
| 28 | 104 | 160 | 197 | 312 | 263 | 181 | 1 | PICD |
| 29 | 104 | 160 | 197 | 312 | 266 | 175 | 2 | ALLS |
| 30 | 104 | 160 | 197 | 315 | 260 | 178 | 1 | ALLS |
| 31 | 104 | 160 | 199 | 309 | 269 | 178 | 1 | ESD |
| 32 | 104 | 162 | 199 | 306 | 275 | 184 | 1 | ESD |
| 33 | 104 | 162 | 199 | 312 | 278 | 181 | 1 | ESD |
| 34 | 104 | 162 | 199 | 318 | 272 | 187 | 1 | ESD |
| 35 | 106 | 156 | 193 | 312 | 269 | 178 | 1 | CARS |
| 36 | 106 | 158 | 195 | 294 | 281 | 166 | 1 | KWD |
| 37 | 106 | 158 | 197 | 306 | 254 | 184 | 1 | MOLS |
| 38 | 106 | 158 | 197 | 306 | 269 | 178 | 1 | RUBS |
| 39 | 106 | 158 | 199 | 318 | 287 | 169 | 1 | CARS |
| 40 | 106 | 158 | 199 | 321 | 272 | 169 | 1 | KWD |
| 41 | 106 | 158 | 199 | 321 | 278 | 169 | 1 | TENS |
| 42 | 106 | 158 | 201 | 315 | 272 | 169 | 1 | RUBS |
| 43 | 106 | 160 | 193 | 297 | 269 | 187 | 1 | ALLS |
| 44 | 106 | 160 | 193 | 300 | 263 | 178 | 1 | ESSN |
| 45 | 106 | 160 | 193 | 303 | 260 | 178 | 3 | ESSN |
| 46 | 106 | 160 | 193 | 303 | 263 | 175 | 1 | ESSN |
| 47 | 106 | 160 | 193 | 303 | 263 | 178 | 1 | ESSN |
| 48 | 106 | 160 | 193 | 306 | 263 | 175 | 1 | RUBS |
| 49 | 106 | 160 | 193 | 309 | 254 | 187 | 1 | PICSO |
| 50 | 106 | 160 | 195 | 285 | 269 | 184 | 1 | ESSO |
| 51 | 106 | 160 | 195 | 288 | 272 | 178 | 1 | ESSO |
| 52 | 106 | 160 | 195 | 300 | 248 | 190 | 1 | SANS |
| 53 | 106 | 160 | 195 | 303 | 266 | 172 | 1 | CONS |
| 54 | 106 | 160 | 195 | 306 | 251 | 181 | 1 | CARS |
| 55 | 106 | 160 | 195 | 306 | 260 | 184 | 1 | CARS |
| 56 | 106 | 160 | 195 | 306 | 266 | 175 | 2 | ALLS, CONS |
| 57 | 106 | 160 | 195 | 306 | 272 | 175 | 1 | RUBS |
| 58 | 106 | 160 | 195 | 309 | 251 | 178 | 2 | ALLS |
| 59 | 106 | 160 | 195 | 309 | 260 | 175 | 1 | CONS |
| 60 | 106 | 160 | 195 | 309 | 260 | 178 | 1 | CONS |
| 61 | 106 | 160 | 195 | 309 | 263 | 172 | 1 | ALLS |
| 62 | 106 | 160 | 195 | 309 | 263 | 181 | 1 | PICSN |
| 63 | 106 | 160 | 195 | 309 | 266 | 172 | 1 | CONS |
| 64 | 106 | 160 | 195 | 309 | 266 | 184 | 1 | CONS |
| 65 | 106 | 160 | 195 | 315 | 266 | 175 | 1 | ALLS |
| 66 | 106 | 160 | 195 | 318 | 257 | 178 | 1 | CONS |
| 67 | 106 | 160 | 195 | 318 | 272 | 175 | 1 | TENS |
| 68 | 106 | 160 | 197 | 279 | 269 | 184 | 1 | SANS |
| 69 | 106 | 160 | 197 | 279 | 272 | 184 | 1 | ESD |
| 70 | 106 | 160 | 197 | 282 | 269 | 169 | 1 | ESSO |
| 71 | 106 | 160 | 197 | 282 | 269 | 184 | 2 | WDRS |
| 72 | 106 | 160 | 197 | 282 | 275 | 184 | 1 | WDRS |
| 73 | 106 | 160 | 197 | 282 | 281 | 184 | 1 | WDRS |
| 74 | 106 | 160 | 197 | 285 | 260 | 190 | 1 | CARS |
| 75 | 106 | 160 | 197 | 285 | 266 | 184 | 1 | ESSO |
| 76 | 106 | 160 | 197 | 285 | 269 | 178 | 1 | WDRS |
| 77 | 106 | 160 | 197 | 285 | 269 | 181 | 1 | WDRS |
| 78 | 106 | 160 | 197 | 285 | 269 | 184 | 2 | ESSN, SANS |
| 79 | 106 | 160 | 197 | 285 | 269 | 190 | 1 | MOLS |
| 80 | 106 | 160 | 197 | 285 | 272 | 184 | 1 | ESSO |
| 81 | 106 | 160 | 197 | 285 | 275 | 181 | 2 | ESSN |
| 82 | 106 | 160 | 197 | 285 | 275 | 184 | 1 | WDRS |
| 83 | 106 | 160 | 197 | 285 | 281 | 181 | 1 | SANS |
| 84 | 106 | 160 | 197 | 288 | 263 | 184 | 1 | WDRS |
| 85 | 106 | 160 | 197 | 288 | 266 | 184 | 1 | WDRS |
| 86 | 106 | 160 | 197 | 288 | 269 | 181 | 1 | ESD |
| 87 | 106 | 160 | 197 | 288 | 269 | 184 | 1 | SANS |
| 88 | 106 | 160 | 197 | 288 | 275 | 184 | 1 | SANS |
| 89 | 106 | 160 | 197 | 288 | 275 | 187 | 1 | ESSN |
| 90 | 106 | 160 | 197 | 288 | 278 | 181 | 1 | SANS |
| 91 | 106 | 160 | 197 | 288 | 281 | 181 | 1 | WDRS |
| 92 | 106 | 160 | 197 | 291 | 269 | 172 | 1 | MOLS |
| 93 | 106 | 160 | 197 | 291 | 269 | 193 | 1 | PICD |
| 94 | 106 | 160 | 197 | 291 | 275 | 184 | 1 | SANS |
| 95 | 106 | 160 | 197 | 294 | 248 | 178 | 1 | SANS |
| 96 | 106 | 160 | 197 | 294 | 263 | 175 | 2 | CONS, KWD |
| 97 | 106 | 160 | 197 | 294 | 263 | 175 | 1 | KWD |
| 98 | 106 | 160 | 197 | 294 | 269 | 181 | 1 | ALLS |
| 99 | 106 | 160 | 197 | 297 | 248 | 187 | 2 | WDRS |
| 100 | 106 | 160 | 197 | 297 | 257 | 184 | 1 | MOLS |
| 101 | 106 | 160 | 197 | 297 | 260 | 175 | 1 | ESSN |
| 102 | 106 | 160 | 197 | 297 | 260 | 187 | 1 | CARS |
| 103 | 106 | 160 | 197 | 297 | 266 | 178 | 1 | PICSN |
| 104 | 106 | 160 | 197 | 297 | 284 | 172 | 1 | ALLS |
| 105 | 106 | 160 | 197 | 300 | 245 | 181 | 1 | SANS |
| 106 | 106 | 160 | 197 | 300 | 248 | 184 | 2 | WDRS |
| 107 | 106 | 160 | 197 | 300 | 248 | 187 | 1 | WDRS |
| 108 | 106 | 160 | 197 | 300 | 251 | 193 | 1 | CONS |
| 109 | 106 | 160 | 197 | 300 | 254 | 181 | 1 | ALLS |
| 110 | 106 | 160 | 197 | 300 | 254 | 187 | 1 | ALLS |
| 111 | 106 | 160 | 197 | 300 | 254 | 190 | 1 | CARS |
| 112 | 106 | 160 | 197 | 300 | 257 | 181 | 1 | SANS |
| 113 | 106 | 160 | 197 | 300 | 260 | 175 | 1 | PICSO |
| 114 | 106 | 160 | 197 | 300 | 266 | 169 | 1 | KWD |
| 115 | 106 | 160 | 197 | 300 | 269 | 163 | 2 | KWD |
| 116 | 106 | 160 | 197 | 300 | 269 | 169 | 1 | RUBS |
| 117 | 106 | 160 | 197 | 300 | 272 | 184 | 1 | TEND |
| 118 | 106 | 160 | 197 | 303 | 248 | 187 | 1 | WDRS |
| 119 | 106 | 160 | 197 | 303 | 251 | 172 | 1 | PICSO |
| 120 | 106 | 160 | 197 | 303 | 251 | 187 | 1 | WDRS |
| 121 | 106 | 160 | 197 | 303 | 254 | 154 | 1 | KWD |
| 122 | 106 | 160 | 197 | 303 | 257 | 184 | 1 | PICSO |
| 123 | 106 | 160 | 197 | 303 | 257 | 187 | 1 | PICD |
| 124 | 106 | 160 | 197 | 303 | 260 | 178 | 1 | MOLS |
| 125 | 106 | 160 | 197 | 303 | 260 | 184 | 1 | CARS |
| 126 | 106 | 160 | 197 | 303 | 263 | 175 | 1 | ESSN |
| 127 | 106 | 160 | 197 | 303 | 263 | 178 | 1 | MOLS |
| 128 | 106 | 160 | 197 | 303 | 263 | 181 | 1 | PICSO |
| 129 | 106 | 160 | 197 | 303 | 263 | 187 | 1 | ALLS |
| 130 | 106 | 160 | 197 | 303 | 266 | 175 | 2 | ALLS, CONS |
| 131 | 106 | 160 | 197 | 303 | 269 | 178 | 1 | CONS |
| 132 | 106 | 160 | 197 | 303 | 269 | 181 | 2 | CONS, MOLS |
| 133 | 106 | 160 | 197 | 303 | 272 | 181 | 1 | MOLS |
| 134 | 106 | 160 | 197 | 303 | 275 | 181 | 1 | MOLS |
| 135 | 106 | 160 | 197 | 303 | 275 | 184 | 1 | MOLS |
| 136 | 106 | 160 | 197 | 306 | 239 | 175 | 1 | RUBS |
| 137 | 106 | 160 | 197 | 306 | 251 | 169 | 2 | WDRS |
| 138 | 106 | 160 | 197 | 306 | 251 | 187 | 1 | CARS |
| 139 | 106 | 160 | 197 | 306 | 254 | 166 | 1 | ESSN |
| 140 | 106 | 160 | 197 | 306 | 254 | 181 | 1 | MOLS |
| 141 | 106 | 160 | 197 | 306 | 254 | 184 | 2 | CARS |
| 142 | 106 | 160 | 197 | 306 | 257 | 181 | 1 | PICSN |
| 143 | 106 | 160 | 197 | 306 | 257 | 184 | 4 | WDRS (2), CARS, PICSO |
| 144 | 106 | 160 | 197 | 306 | 260 | 178 | 1 | CARS |
| 145 | 106 | 160 | 197 | 306 | 260 | 184 | 2 | ALLS, CARS |
| 146 | 106 | 160 | 197 | 306 | 260 | 187 | 1 | CARS |
| 147 | 106 | 160 | 197 | 306 | 260 | 190 | 2 | CARS |
| 148 | 106 | 160 | 197 | 306 | 263 | 181 | 3 | MOLS (2), PICSO |
| 149 | 106 | 160 | 197 | 306 | 263 | 184 | 1 | PICSO |
| 150 | 106 | 160 | 197 | 306 | 266 | 172 | 1 | RUBS |
| 151 | 106 | 160 | 197 | 306 | 266 | 175 | 8 | ALLS (3), CONS (3), TENS, RUBS |
| 152 | 106 | 160 | 197 | 306 | 266 | 181 | 3 | MOLS (2), ALLS |
| 153 | 106 | 160 | 197 | 306 | 266 | 184 | 3 | MOLS (2), PICSO |
| 154 | 106 | 160 | 197 | 306 | 266 | 187 | 3 | CONS, PICSN, PICSO |
| 155 | 106 | 160 | 197 | 306 | 269 | 172 | 1 | MOLS |
| 156 | 106 | 160 | 197 | 306 | 269 | 175 | 2 | CONS, TENS |
| 157 | 106 | 160 | 197 | 306 | 269 | 187 | 2 | MOLS, PICSN |
| 158 | 106 | 160 | 197 | 306 | 269 | 190 | 1 | PICSO |
| 159 | 106 | 160 | 197 | 306 | 272 | 172 | 1 | MOLS |
| 160 | 106 | 160 | 197 | 306 | 272 | 184 | 3 | ALLS, CARS, PICSO |
| 161 | 106 | 160 | 197 | 306 | 275 | 190 | 1 | CARS |
| 162 | 106 | 160 | 197 | 306 | 278 | 175 | 3 | TENS |
| 163 | 106 | 160 | 197 | 309 | 251 | 184 | 1 | CARS |
| 164 | 106 | 160 | 197 | 309 | 254 | 175 | 1 | CARS |
| 165 | 106 | 160 | 197 | 309 | 254 | 181 | 1 | PICSN |
| 166 | 106 | 160 | 197 | 309 | 254 | 184 | 1 | CARS |
| 167 | 106 | 160 | 197 | 309 | 254 | 187 | 2 | CARS |
| 168 | 106 | 160 | 197 | 309 | 257 | 184 | 3 | CARS, PICSO, PICSN |
| 169 | 106 | 160 | 197 | 309 | 257 | 187 | 1 | MOLS |
| 170 | 106 | 160 | 197 | 309 | 260 | 175 | 1 | RUBS |
| 171 | 106 | 160 | 197 | 309 | 260 | 181 | 1 | MOLS |
| 172 | 106 | 160 | 197 | 309 | 260 | 184 | 1 | PICSN |
| 173 | 106 | 160 | 197 | 309 | 260 | 187 | 1 | CARS |
| 174 | 106 | 160 | 197 | 309 | 263 | 172 | 1 | TENS |
| 175 | 106 | 160 | 197 | 309 | 263 | 175 | 1 | CONS |
| 176 | 106 | 160 | 197 | 309 | 263 | 181 | 8 | MOLS (6), PICSO, PICD |
| 177 | 106 | 160 | 197 | 309 | 263 | 187 | 4 | ALLS, PICD, MOLS, PICSN |
| 178 | 106 | 160 | 197 | 309 | 266 | 172 | 3 | TENS, ESD, RUBS |
| 179 | 106 | 160 | 197 | 309 | 266 | 175 | 3 | MOLS (2), TENS |
| 180 | 106 | 160 | 197 | 309 | 266 | 184 | 3 | PICD, MOLS, PICSO |
| 181 | 106 | 160 | 197 | 309 | 266 | 187 | 8 | PICSN (5), PICSO (2), ALLS |
| 182 | 106 | 160 | 197 | 309 | 269 | 172 | 2 | RUBS |
| 183 | 106 | 160 | 197 | 309 | 269 | 175 | 1 | RUBS |
| 184 | 106 | 160 | 197 | 309 | 269 | 181 | 1 | CONS |
| 185 | 106 | 160 | 197 | 309 | 269 | 187 | 4 | PICSO (2), PICSN, ALLS |
| 186 | 106 | 160 | 197 | 309 | 269 | 190 | 1 | PICSO |
| 187 | 106 | 160 | 197 | 309 | 272 | 175 | 1 | ALLS |
| 188 | 106 | 160 | 197 | 309 | 272 | 178 | 1 | RUBS |
| 189 | 106 | 160 | 197 | 309 | 272 | 181 | 1 | MOLS |
| 190 | 106 | 160 | 197 | 309 | 275 | 175 | 1 | RUBS |
| 191 | 106 | 160 | 197 | 312 | 245 | 184 | 1 | MOLS |
| 192 | 106 | 160 | 197 | 312 | 248 | 175 | 2 | MOLS |
| 193 | 106 | 160 | 197 | 312 | 251 | 187 | 1 | PICSO |
| 194 | 106 | 160 | 197 | 312 | 254 | 184 | 1 | ALLS |
| 195 | 106 | 160 | 197 | 312 | 254 | 187 | 4 | CARS (3), PICSO |
| 196 | 106 | 160 | 197 | 312 | 257 | 184 | 2 | CARS |
| 197 | 106 | 160 | 197 | 312 | 257 | 190 | 1 | CARS |
| 198 | 106 | 160 | 197 | 312 | 260 | 184 | 1 | CARS |
| 199 | 106 | 160 | 197 | 312 | 260 | 190 | 2 | CARS |
| 200 | 106 | 160 | 197 | 312 | 263 | 178 | 1 | ALLS |
| 201 | 106 | 160 | 197 | 312 | 263 | 181 | 2 | PICD, MOLS |
| 202 | 106 | 160 | 197 | 312 | 263 | 184 | 1 | ALLS |
| 203 | 106 | 160 | 197 | 312 | 263 | 187 | 1 | CARS |
| 204 | 106 | 160 | 197 | 312 | 266 | 175 | 1 | CONS |
| 205 | 106 | 160 | 197 | 312 | 266 | 184 | 1 | ALLS |
| 206 | 106 | 160 | 197 | 312 | 266 | 187 | 1 | PICD |
| 207 | 106 | 160 | 197 | 312 | 269 | 172 | 1 | ALLS |
| 208 | 106 | 160 | 197 | 312 | 272 | 172 | 1 | RUBS |
| 209 | 106 | 160 | 197 | 312 | 272 | 178 | 1 | CONS |
| 210 | 106 | 160 | 197 | 312 | 272 | 184 | 2 | CARS, PICSO |
| 211 | 106 | 160 | 197 | 312 | 275 | 184 | 1 | MOLS |
| 212 | 106 | 160 | 197 | 312 | 278 | 187 | 1 | CARS |
| 213 | 106 | 160 | 197 | 315 | 248 | 184 | 1 | CARS |
| 214 | 106 | 160 | 197 | 315 | 251 | 181 | 1 | ALLS |
| 215 | 106 | 160 | 197 | 315 | 254 | 175 | 3 | ALLS, CONS, MOLS |
| 216 | 106 | 160 | 197 | 315 | 254 | 184 | 2 | CARS |
| 217 | 106 | 160 | 197 | 315 | 257 | 190 | 1 | CARS |
| 218 | 106 | 160 | 197 | 315 | 260 | 175 | 1 | RUBS |
| 219 | 106 | 160 | 197 | 315 | 260 | 187 | 1 | CARS |
| 220 | 106 | 160 | 197 | 315 | 260 | 193 | 1 | CARS |
| 221 | 106 | 160 | 197 | 315 | 263 | 181 | 1 | MOLS |
| 222 | 106 | 160 | 197 | 315 | 266 | 169 | 1 | ALLS |
| 223 | 106 | 160 | 197 | 315 | 266 | 181 | 1 | MOLS |
| 224 | 106 | 160 | 197 | 315 | 269 | 178 | 1 | ALLS |
| 225 | 106 | 160 | 197 | 315 | 275 | 175 | 2 | ALLS, CONS |
| 226 | 106 | 160 | 197 | 318 | 248 | 178 | 2 | CARS |
| 227 | 106 | 160 | 197 | 318 | 251 | 172 | 1 | PICSN |
| 228 | 106 | 160 | 197 | 318 | 257 | 175 | 1 | RUBS |
| 229 | 106 | 160 | 197 | 321 | 254 | 184 | 1 | PICSN |
| 230 | 106 | 160 | 197 | 321 | 257 | 172 | 1 | MOLS |
| 231 | 106 | 160 | 199 | 297 | 281 | 193 | 1 | KWD |
| 232 | 106 | 160 | 199 | 300 | 272 | 184 | 1 | KWD |
| 233 | 106 | 160 | 199 | 303 | 260 | 184 | 1 | CARS |
| 234 | 106 | 160 | 199 | 303 | 284 | 172 | 1 | ALLS |
| 235 | 106 | 160 | 199 | 303 | 284 | 175 | 1 | ALLS |
| 236 | 106 | 160 | 199 | 303 | 293 | 190 | 1 | PICD |
| 237 | 106 | 160 | 199 | 306 | 293 | 193 | 2 | PICD |
| 238 | 106 | 160 | 199 | 309 | 272 | 181 | 1 | ESD |
| 239 | 106 | 160 | 199 | 309 | 275 | 175 | 1 | KWD |
| 240 | 106 | 160 | 199 | 309 | 275 | 181 | 1 | ESD |
| 241 | 106 | 160 | 199 | 309 | 281 | 175 | 3 | PICD |
| 242 | 106 | 160 | 199 | 309 | 284 | 172 | 1 | PICD |
| 243 | 106 | 160 | 199 | 309 | 284 | 178 | 1 | KWD |
| 244 | 106 | 160 | 199 | 309 | 284 | 187 | 1 | ESD |
| 245 | 106 | 160 | 199 | 309 | 284 | 196 | 1 | SANS |
| 246 | 106 | 160 | 199 | 309 | 290 | 175 | 1 | KWD |
| 247 | 106 | 160 | 199 | 309 | 290 | 193 | 1 | SANS |
| 248 | 106 | 160 | 199 | 312 | 275 | 175 | 1 | ESD |
| 249 | 106 | 160 | 199 | 312 | 281 | 172 | 1 | PICD |
| 250 | 106 | 160 | 199 | 312 | 281 | 178 | 1 | ESSN |
| 251 | 106 | 160 | 199 | 312 | 299 | 193 | 1 | KWD |
| 252 | 106 | 160 | 199 | 318 | 266 | 190 | 1 | ALLS |
| 253 | 106 | 160 | 199 | 318 | 272 | 178 | 1 | ESD |
| 254 | 106 | 160 | 199 | 321 | 269 | 184 | 1 | ESD |
| 255 | 106 | 160 | 199 | 324 | 275 | 178 | 1 | ESD |
| 256 | 106 | 160 | 199 | 327 | 287 | 169 | 1 | CARS |
| 257 | 106 | 160 | 199 | 339 | 263 | 184 | 1 | ESD |
| 258 | 106 | 160 | 201 | 306 | 263 | 172 | 1 | ALLS |
| 259 | 106 | 160 | 201 | 309 | 269 | 175 | 1 | CONS |
| 260 | 106 | 160 | 203 | 303 | 272 | 169 | 1 | MOLS |
| 261 | 106 | 160 | 203 | 303 | 275 | 169 | 1 | MOLS |
| 262 | 106 | 162 | 197 | 312 | 275 | 178 | 1 | ESD |
| 263 | 106 | 162 | 199 | 309 | 278 | 175 | 1 | ESD |
| 264 | 106 | 164 | 199 | 309 | 290 | 184 | 1 | ALLS |
| 265 | 108 | 156 | 201 | 312 | 272 | 166 | 1 | RUBS |
| 266 | 108 | 158 | 195 | 291 | 272 | 166 | 1 | KWD |
| 267 | 108 | 158 | 195 | 291 | 275 | 166 | 2 | KWD |
| 268 | 108 | 158 | 195 | 294 | 275 | 166 | 3 | KWD |
| 269 | 108 | 158 | 195 | 294 | 278 | 166 | 5 | KWD |
| 270 | 108 | 158 | 195 | 294 | 281 | 166 | 1 | KWD |
| 271 | 108 | 158 | 195 | 309 | 269 | 166 | 1 | ESD |
| 272 | 108 | 158 | 195 | 309 | 272 | 166 | 1 | KWD |
| 273 | 108 | 158 | 195 | 312 | 272 | 169 | 1 | ESD |
| 274 | 108 | 158 | 195 | 312 | 275 | 169 | 1 | ALLS |
| 275 | 108 | 158 | 197 | 300 | 260 | 163 | 1 | SANS |
| 276 | 108 | 158 | 197 | 300 | 275 | 172 | 1 | ESD |
| 277 | 108 | 158 | 197 | 309 | 278 | 172 | 1 | ESSN |
| 278 | 108 | 158 | 197 | 312 | 278 | 166 | 1 | PICD |
| 279 | 108 | 158 | 197 | 318 | 272 | 160 | 1 | TEND |
| 280 | 108 | 158 | 197 | 318 | 272 | 169 | 1 | WDRS |
| 281 | 108 | 158 | 197 | 321 | 269 | 169 | 1 | TEND |
| 282 | 108 | 158 | 199 | 300 | 269 | 175 | 1 | SANS |
| 283 | 108 | 158 | 199 | 300 | 272 | 166 | 1 | ESD |
| 284 | 108 | 158 | 199 | 303 | 281 | 166 | 1 | TEND |
| 285 | 108 | 158 | 199 | 306 | 266 | 169 | 1 | TENS |
| 286 | 108 | 158 | 199 | 306 | 269 | 163 | 1 | ALLS |
| 287 | 108 | 158 | 199 | 306 | 272 | 166 | 1 | KWD |
| 288 | 108 | 158 | 199 | 306 | 278 | 175 | 1 | KWD |
| 289 | 108 | 158 | 199 | 306 | 284 | 175 | 1 | TEND |
| 290 | 108 | 158 | 199 | 306 | 293 | 169 | 1 | TEND |
| 291 | 108 | 158 | 199 | 309 | 269 | 169 | 1 | KWD |
| 292 | 108 | 158 | 199 | 309 | 272 | 169 | 1 | CARS |
| 293 | 108 | 158 | 199 | 309 | 281 | 166 | 1 | ESD |
| 294 | 108 | 158 | 199 | 312 | 263 | 166 | 1 | RUBS |
| 295 | 108 | 158 | 199 | 312 | 272 | 163 | 1 | ESD |
| 296 | 108 | 158 | 199 | 312 | 275 | 169 | 2 | KWD, RUBS |
| 297 | 108 | 158 | 199 | 312 | 278 | 166 | 1 | KWD |
| 298 | 108 | 158 | 199 | 315 | 281 | 169 | 1 | TENS |
| 299 | 108 | 158 | 199 | 315 | 287 | 169 | 1 | ESSN |
| 300 | 108 | 158 | 199 | 318 | 260 | 172 | 1 | KWD |
| 301 | 108 | 158 | 199 | 318 | 266 | 163 | 1 | KWD |
| 302 | 108 | 158 | 199 | 318 | 272 | 160 | 1 | CONS |
| 303 | 108 | 158 | 199 | 321 | 266 | 169 | 1 | ALLS |
| 304 | 108 | 158 | 199 | 321 | 269 | 172 | 1 | TENS |
| 305 | 108 | 158 | 199 | 321 | 272 | 163 | 1 | TENS |
| 306 | 108 | 158 | 201 | 300 | 278 | 163 | 2 | RUBS |
| 307 | 108 | 158 | 201 | 303 | 266 | 163 | 1 | TEND |
| 308 | 108 | 158 | 201 | 303 | 278 | 172 | 2 | TEND |
| 309 | 108 | 158 | 201 | 306 | 275 | 166 | 1 | TEND |
| 310 | 108 | 158 | 201 | 309 | 254 | 166 | 2 | KWD |
| 311 | 108 | 158 | 201 | 309 | 266 | 172 | 1 | TEND |
| 312 | 108 | 158 | 201 | 309 | 272 | 166 | 1 | TEND |
| 313 | 108 | 158 | 201 | 309 | 275 | 169 | 1 | RUBS |
| 314 | 108 | 158 | 201 | 312 | 278 | 166 | 1 | MOLS |
| 315 | 108 | 158 | 201 | 312 | 281 | 166 | 1 | TEND |
| 316 | 108 | 158 | 201 | 312 | 284 | 166 | 1 | TEND |
| 317 | 108 | 158 | 201 | 315 | 266 | 166 | 1 | TEND |
| 318 | 108 | 158 | 201 | 315 | 269 | 166 | 3 | TEND (2), RUBS |
| 319 | 108 | 158 | 201 | 315 | 272 | 169 | 1 | RUBS |
| 320 | 108 | 158 | 201 | 315 | 290 | 166 | 1 | TEND |
| 321 | 108 | 158 | 201 | 318 | 269 | 166 | 1 | TEND |
| 322 | 108 | 158 | 201 | 318 | 269 | 172 | 1 | KWD |
| 323 | 108 | 158 | 201 | 321 | 266 | 169 | 2 | KWD |
| 324 | 108 | 158 | 201 | 321 | 269 | 169 | 1 | KWD |
| 325 | 108 | 158 | 201 | 336 | 287 | 166 | 1 | TEND |
| 326 | 108 | 160 | 193 | 312 | 260 | 172 | 1 | ALLS |
| 327 | 108 | 160 | 197 | 282 | 254 | 193 | 1 | ESSN |
| 328 | 108 | 160 | 197 | 282 | 275 | 178 | 1 | ESSO |
| 329 | 108 | 160 | 197 | 285 | 254 | 187 | 1 | ESSO |
| 330 | 108 | 160 | 197 | 285 | 254 | 193 | 1 | ESSN |
| 331 | 108 | 160 | 197 | 285 | 266 | 184 | 1 | SANS |
| 332 | 108 | 160 | 197 | 285 | 269 | 184 | 1 | WDRS |
| 333 | 108 | 160 | 197 | 288 | 248 | 193 | 1 | ESSO |
| 334 | 108 | 160 | 197 | 288 | 254 | 181 | 1 | ESSO |
| 335 | 108 | 160 | 197 | 288 | 254 | 184 | 2 | ESSO |
| 336 | 108 | 160 | 197 | 288 | 254 | 187 | 6 | ESSO (5), ESSN |
| 337 | 108 | 160 | 197 | 288 | 254 | 190 | 2 | ESSO, ESSN |
| 338 | 108 | 160 | 197 | 288 | 254 | 193 | 1 | ESSO |
| 339 | 108 | 160 | 197 | 288 | 257 | 187 | 1 | ESSN |
| 340 | 108 | 160 | 197 | 288 | 257 | 190 | 1 | ESSN |
| 341 | 108 | 160 | 197 | 291 | 248 | 190 | 1 | ESSO |
| 342 | 108 | 160 | 197 | 291 | 254 | 190 | 1 | ESSO |
| 343 | 108 | 160 | 197 | 294 | 254 | 196 | 1 | ESSO |
| 344 | 108 | 160 | 197 | 294 | 272 | 181 | 1 | CARS |
| 345 | 108 | 160 | 197 | 297 | 269 | 172 | 1 | TENS |
| 346 | 108 | 160 | 197 | 300 | 266 | 172 | 1 | ESSN |
| 347 | 108 | 160 | 197 | 303 | 257 | 178 | 1 | PICSO |
| 348 | 108 | 160 | 197 | 303 | 269 | 184 | 1 | MOLS |
| 349 | 108 | 160 | 197 | 306 | 266 | 175 | 1 | RUBS |
| 350 | 108 | 160 | 197 | 306 | 269 | 172 | 1 | CONS |
| 351 | 108 | 160 | 197 | 309 | 260 | 184 | 1 | PICSO |
| 352 | 108 | 160 | 197 | 309 | 260 | 187 | 1 | MOLS |
| 353 | 108 | 160 | 197 | 309 | 263 | 175 | 1 | KWD |
| 354 | 108 | 160 | 197 | 309 | 266 | 187 | 1 | PICSO |
| 355 | 108 | 160 | 197 | 309 | 269 | 172 | 2 | ESSO |
| 356 | 108 | 160 | 197 | 309 | 269 | 181 | 1 | RUBS |
| 357 | 108 | 160 | 197 | 312 | 260 | 187 | 1 | PICSO |
| 358 | 108 | 160 | 197 | 312 | 263 | 172 | 1 | CONS |
| 359 | 108 | 160 | 197 | 312 | 266 | 169 | 1 | ESSO |
| 360 | 108 | 160 | 197 | 312 | 266 | 175 | 1 | CONS |
| 361 | 108 | 160 | 197 | 312 | 269 | 172 | 1 | ESSO |
| 362 | 108 | 160 | 197 | 318 | 251 | 184 | 1 | ALLS |
| 363 | 108 | 160 | 199 | 306 | 275 | 172 | 1 | ALLS |
| 364 | 108 | 160 | 199 | 306 | 278 | 178 | 1 | ALLS |
| 365 | 108 | 160 | 199 | 309 | 272 | 175 | 1 | PICD |
| 366 | 108 | 160 | 199 | 309 | 281 | 169 | 1 | CONS |
| 367 | 108 | 160 | 199 | 312 | 266 | 190 | 1 | WDRS |
| 368 | 108 | 160 | 199 | 312 | 269 | 175 | 1 | CARS |
| 369 | 108 | 160 | 199 | 312 | 272 | 175 | 1 | CARS |
| 370 | 108 | 160 | 199 | 312 | 275 | 169 | 1 | ALLS |
| 371 | 108 | 160 | 199 | 312 | 281 | 172 | 1 | PICD |
| 372 | 108 | 160 | 199 | 312 | 293 | 172 | 1 | PICD |
| 373 | 108 | 160 | 199 | 315 | 260 | 184 | 1 | WDRS |
| 374 | 108 | 160 | 199 | 318 | 266 | 178 | 1 | SANS |
| 375 | 108 | 160 | 199 | 318 | 275 | 178 | 1 | ESD |
| 376 | 108 | 160 | 201 | 309 | 284 | 166 | 1 | TENS |
| 377 | 110 | 158 | 199 | 318 | 284 | 166 | 1 | KWD |
| 378 | 110 | 158 | 199 | 327 | 290 | 166 | 1 | ALLS |
| 379 | 110 | 158 | 201 | 318 | 272 | 166 | 1 | RUBS |
| 380 | 110 | 158 | 201 | 318 | 275 | 163 | 1 | TEND |
| 381 | 110 | 160 | 197 | 288 | 254 | 193 | 1 | ESSN |
| 382 | 110 | 160 | 197 | 327 | 272 | 166 | 1 | TENS |
| 383 | 110 | 160 | 197 | 342 | 296 | 175 | 1 | RUBS |
| 384 | 110 | 160 | 199 | 312 | 254 | 190 | 1 | WDRS |
| 385 | 112 | 158 | 199 | 315 | 284 | 169 | 1 | ESSN |
| 386 | 112 | 158 | 201 | 315 | 275 | 166 | 1 | TEND |
| 387 | 112 | 158 | 201 | 318 | 275 | 166 | 1 | TEND |
| 388 | 114 | 158 | 201 | 309 | 272 | 166 | 1 | RUBS |
